# Supplementary material for: A novel focal adhesion related gene signature for prognostic prediction in hepatocellular carcinoma
Source: publisher site journal article supplement (doi:10.18632/aging.202871), 2021-04-13
Supplement: Supplementary file [file aging-v13i7-202871-supplementary-material-SD4.pdf]

## SUPPLEMENTARY TABLES

Supplementary Table 3. The primer sequences of the five prognostic genes.

| Primers for detection prognostic genes |                            |                           |
|----------------------------------------|----------------------------|---------------------------|
| Gene                                   | Forward Primer             | Reverse Primer            |
| FYN                                    | CCCAACTACAACAACCTCCACG     | GCTGGGAATGTAACCTGTCTCTC   |
| PPP1CB                                 | GTCGTCCAGGAAAGATTGTGC      | AAGATAGTTGGCTTCTGGTGGG    |
| PPP1CC                                 | AACGGCTGCTGGAAGTGAGA       | CACATAGTCCCCAAGAAACAGGTA  |
| RAC1                                   | AGGCCATCAAGTGTGTGGTG       | AAGAACACATCTGTTTGCGGA     |
| SPP1                                   | CGAAGTTTTCACTCCAGTTGTCC    | AGGTGATGTCCTCGTCTGTAGC    |
| beta-actin                             | CACCCAGCACAAATGAAGATCAAGAT | CCAGTTTTTAAATCCTGAGTCAAGC |

**Supplementary Table 4. The results of correlation analysis of the prognosis gene expression and chemotherapy drug sensitivity.**

| <b>Gene</b> | <b>Drug</b>                              | <b>cor</b> | <b>P value</b> |
|-------------|------------------------------------------|------------|----------------|
| PPP1CC      | Chelerythrine                            | 0.441276   | 0.000417       |
| PPP1CC      | AT-13387                                 | 0.387333   | 0.002232       |
| FYN         | 8-Chloro-adenosine                       | -0.37588   | 0.00308        |
| SPP1        | Gefitinib                                | 0.375562   | 0.003107       |
| FYN         | PX-316                                   | 0.365799   | 0.00405        |
| PPP1CC      | Amonafide                                | 0.36321    | 0.00434        |
| FYN         | Afatinib                                 | -0.35729   | 0.00507        |
| SPP1        | Erlotinib                                | 0.354486   | 0.005454       |
| SPP1        | Lapatinib                                | 0.349174   | 0.006249       |
| FYN         | AFP464                                   | -0.34638   | 0.006706       |
| FYN         | AP-26113                                 | -0.3443    | 0.007065       |
| FYN         | Erlotinib                                | -0.34236   | 0.007416       |
| FYN         | Nitrogen mustard                         | -0.34175   | 0.007529       |
| PPP1CC      | Fenretinide                              | 0.340414   | 0.007782       |
| PPP1CC      | Everolimus                               | -0.33663   | 0.00854        |
| RAC1        | Fluorouracil                             | -0.33528   | 0.008826       |
| PPP1CC      | Parthenolide                             | 0.334771   | 0.008936       |
| FYN         | Dasatinib                                | -0.32779   | 0.010567       |
| FYN         | SR16157                                  | -0.3271    | 0.010741       |
| SPP1        | bisacodyl, active ingredient of viraplex | -0.32687   | 0.010801       |
| SPP1        | Vandetanib                               | 0.325235   | 0.011225       |
| FYN         | Bosutinib                                | -0.32482   | 0.011335       |
| PPP1CC      | Hydroxyurea                              | 0.323699   | 0.011638       |
| FYN         | Ifosfamide                               | 0.321856   | 0.01215        |
| FYN         | AZD-9291                                 | -0.32021   | 0.012624       |
| FYN         | Fluorouracil                             | -0.31794   | 0.013304       |
| FYN         | Fulvestrant                              | -0.31674   | 0.013675       |
| SPP1        | Ibrutinib                                | 0.314877   | 0.01427        |
| PPP1CC      | Obatoclox                                | 0.312132   | 0.015186       |
| SPP1        | O-6-Benzylguanidine                      | 0.310572   | 0.01573        |
| PPP1CC      | Fludarabine                              | 0.309772   | 0.016015       |
| PPP1CC      | Vorinostat                               | 0.307914   | 0.016694       |
| SPP1        | AZD-9291                                 | 0.305134   | 0.017755       |
| SPP1        | Acetalax                                 | -0.30066   | 0.019585       |
| RAC1        | By-Product of CUDC-305                   | -0.29558   | 0.021854       |
| FYN         | Nelarabine                               | 0.295181   | 0.022042       |
| FYN         | okadaic acid                             | 0.294564   | 0.022334       |
| PPP1CC      | RH1                                      | 0.293265   | 0.022961       |
| FYN         | PD-98059                                 | 0.293151   | 0.023017       |
| PPP1CB      | Tegafur                                  | -0.29263   | 0.023272       |
| RAC1        | Simvastatin                              | 0.29189    | 0.02364        |
| FYN         | Elesclomol                               | -0.29039   | 0.024402       |
| FYN         | Chelerythrine                            | 0.289922   | 0.024641       |
| PPP1CC      | 8-Chloro-adenosine                       | 0.288427   | 0.025426       |
| SPP1        | Cordycepin                               | -0.28794   | 0.025684       |

|        |                                          |          |          |
|--------|------------------------------------------|----------|----------|
| FYN    | Ibrutinib                                | -0.28792 | 0.025698 |
| PPP1CC | Pyrazoloacridine                         | 0.286543 | 0.026444 |
| RAC1   | Denileukin Diftitox Ontak                | -0.28369 | 0.02805  |
| SPP1   | Afatinib                                 | 0.283317 | 0.028267 |
| PPP1CC | Palbociclib                              | 0.280656 | 0.029849 |
| FYN    | BML-277                                  | -0.28028 | 0.030081 |
| SPP1   | Dabrafenib                               | 0.278976 | 0.030886 |
| FYN    | Pipamperone                              | 0.278767 | 0.031018 |
| FYN    | Aminoflavone                             | -0.27842 | 0.031235 |
| FYN    | Salinomycin                              | -0.27837 | 0.031268 |
| PPP1CB | Dabrafenib                               | -0.27821 | 0.031371 |
| PPP1CB | Entinostat                               | -0.27667 | 0.032358 |
| FYN    | Vemurafenib                              | 0.276352 | 0.032566 |
| FYN    | Allopurinol                              | -0.27561 | 0.033052 |
| SPP1   | Tyrothricin                              | -0.27432 | 0.033919 |
| PPP1CB | Ixabepilone                              | -0.27379 | 0.034277 |
| PPP1CC | Nelarabine                               | 0.273062 | 0.034778 |
| PPP1CC | Imexon                                   | 0.271078 | 0.036171 |
| FYN    | Gefitinib                                | -0.27104 | 0.036199 |
| PPP1CC | Cladribine                               | 0.268455 | 0.038085 |
| PPP1CC | Allopurinol                              | 0.267602 | 0.038725 |
| PPP1CB | 6-Mercaptopurine                         | -0.26759 | 0.038735 |
| FYN    | Tegafur                                  | -0.26681 | 0.039326 |
| PPP1CB | Vemurafenib                              | -0.26558 | 0.040278 |
| FYN    | Sonidegib                                | -0.26506 | 0.040684 |
| PPP1CC | Belinostat                               | 0.264338 | 0.041257 |
| FYN    | Everolimus                               | -0.26137 | 0.043673 |
| FYN    | Vandetanib                               | -0.2582  | 0.046388 |
| FYN    | 1st Precursor Intermediate to TDP 665759 | -0.25774 | 0.04679  |
| SPP1   | Cobimetinib (isomer 1)                   | 0.25733  | 0.047155 |
| FYN    | Itraconazole                             | -0.25568 | 0.048637 |
| PPP1CC | Cytarabine                               | 0.254939 | 0.049319 |
| SPP1   | Trametinib                               | 0.254883 | 0.04937  |

**Supplementary Table 5. The detail information of the antibodies used in immunohistochemistry.**

| <b>Protein</b> | <b>Antibody Name</b>            | <b>Antibody Number</b> | <b>Company</b> |
|----------------|---------------------------------|------------------------|----------------|
| FYN            | Anti-FYN antibody [D2-A10]      | EM1709-88              | HUABIO         |
| PPP1CB         | Anti-PPP1CB antibody [A7-C7]    | EM1706-97              | HUABIO         |
| PPP1CC         | PPP1CC Polyclonal Antibody      | 11082-1-AP             | Proteintech    |
| RAC1           | RAC1 Monoclonal Antibody        | 66122-1-Ig             | Proteintech    |
| SPP1           | Osteopontin Polyclonal Antibody | 22952-1-AP             | Proteintech    |
