# Supplementary material for: A novel focal adhesion related gene signature for prognostic prediction in hepatocellular carcinoma
Source: Aging (Albany NY). 2021 Apr 13;13(7):10724–48. doi: 10.18632/aging.202871 (PMC8064231; doi:10.18632/aging.202871)
Supplement: Supplementary Table 2 [file aging-13-202871-s003.xlsx]

## Sheet: Sheet1
Supplementary Table 2. The 263 chemotherapy drugs by the FDA or obtained from clinical trials.
Drug name
Curcumin
Chelerythrine
3-Bromopyruvate (acid)
Cordycepin
Benzimate
Pimozide
Elesclomol
Wortmannin
geldanamycin analog
Elliptinium Acetate
Triciribine phosphate
BEN
Amonafide
Batracylin
Buthionine sulphoximine
Tanespimycin
8-Chloro-adenosine
Hypothemycin
Fostamatinib
Pyrazoloacridine
Fenretinide
Dolastatin 10
Staurosporine
Pyrazoloacridine
Lapachone
O-6-Benzylguanine
7-Hydroxystaurosporine
7-Hydroxystaurosporine
Perifosine
Alvocidib
Midostaurin
XK-469
Triapine
kahalide f
okadaic acid
PD-98059
Epothilone B
Aminoflavone
BN-2629
LY-294002
RH1
XK-469
5-fluoro deoxy uridine 10mer
Seliciclib
Entinostat
Alvespimycin
7-Tert-butyldimethylsilyl-10-hydroxycamptothecin
Karenitecin
PX-316
AFP464
Rebimastat
Imexon
E-7820
LMP-400
LMP776
Lificguat
SR16157
Dimethylaminoparthenolide
Selumetinib
BML-277
Obatoclax
AT-13387
Salinomycin
Itraconazole
XL-147
Hydrastinine HCl
1st Precursor Intermediate to TDP 665759
(+)-JQ1
Fenretinide
AP-26113
By-Product of CUDC-305
LOR-253
Pelitrexol
Cobimetinib (isomer 1)
Bafetinib
Methotrexate
6-Mercaptopurine
6-Mercaptopurine
Nitrogen mustard
Allopurinol
Actinomycin D
Chlorambucil
Thiotepa
Melphalan
Triethylenemelamine
Dromostanolone Propionate
Acrichine
Fluorouracil
Nandrolone phenpropionate
Testolactone
Mithramycin
Pipobroman
Cyclophosphamide
Mitomycin
Floxuridine
Hydroxyurea
Uracil mustard
Dexamethasone Decadron
Dacarbazine
Dacarbazine
Vinblastine
Acetalax
Cytarabine
Vincristine
Megestrol acetate
tfdu
Procarbazine
Lomustine
Daunorubicin
Daunorubicin
Streptozocin
Calusterone
Estramustine
Vinblastine
Fluphenazine
Arsenic trioxide
Azacitidine
Cladribine
Mithramycin
Asparaginase
Ifosfamide
Acetalax
Fludarabine
Cisplatin
Isotretinoin
Teniposide
Doxorubicin
Fludarabine
Bleomycin
Paclitaxel
Decitabine
Mitomycin
Bendamustine
Etoposide
Homoharringtonine
Mithramycin
Tegafur
Parthenolide
Dexrazoxane
Tamoxifen
Pentostatin
Rapamycin
Carboplatin
Valrubicin
Idarubicin
Epirubicin
Oxaliplatin
Mitoxantrone
Cytarabine
Mitoxantrone
Fludarabine
Imiquimod
Carmustine
Mithramycin
Rapamycin
Clofarabine
Vinorelbine
Topotecan
Gemcitabine
bisacodyl, active ingredient of viraplex
Irinotecan
Docetaxel
Depsipeptide
Simvastatin
Raltitrexed
7-Ethyl-10-hydroxycamptothecin
Bortezomib
Irofulven
Temsirolimus
Denileukin Diftitox Ontak
Pemetrexed
Vorinostat
Estramustine
Arsenic trioxide
Eribulin mesilate
Gefitinib
Erlotinib
Fulvestrant
Celecoxib
Zoledronate
Belinostat
Lapatinib
Irinotecan
Dasatinib
Everolimus
Pazopanib
Imatinib
Lapatinib
Nelfinavir
Nilotinib
Olaparib
Ixabepilone
Raloxifene
Abiraterone
Abiraterone
Sunitinib
Afatinib
Pazopanib
Olaparib
Depsipeptide
Pralatrexate
Pemetrexed
Vismodegib
Actinomycin D
Mitomycin
Lenvatinib
Nelarabine
Crizotinib
Daunorubicin
Digoxin
Ethinyl estradiol
Fluorouracil
Nitrogen mustard
Melphalan
6-Mercaptopurine
Tyrothricin
Vinblastine
Cabozantinib
Axitinib
Etoposide
Azacitidine
Floxuridine
Trametinib
Palbociclib
Carfilzomib
Homoharringtonine
Ixazomib citrate
Teniposide
Ponatinib
Bleomycin
Paclitaxel
Rapamycin
Teniposide
Simvastatin
Belinostat
Doxorubicin
Vincristine
Pipamperone
Epirubicin
Idelalisib
Topotecan
Arsenic trioxide
6-Mercaptopurine
Docetaxel
Vorinostat
Gefitinib
Clofarabine
Dasatinib
Irinotecan
Vinorelbine
Vandetanib
Cabozantinib
Panobinostat
Sonidegib
Vemurafenib
Ibrutinib
Alectinib
Dabrafenib
Bosutinib
ABT-199
LDK-378
LDK-378
AZD-9291
